# Supplementary material for: Cocoa Nanoparticles to Improve the Physicochemical and Functional Properties of Whey Protein-Based Films to Extend the Shelf Life of Muffins
Source: MDPI journal article supplement (doi:10.3390/foods10112672), 2021-11-03

**Figure. S1.** Appearance of the (A) protein solution with 8% WPC and 6% glycerol (G); and (B) nanoemulsion with 8% WPC, 6% G and 2% CL.

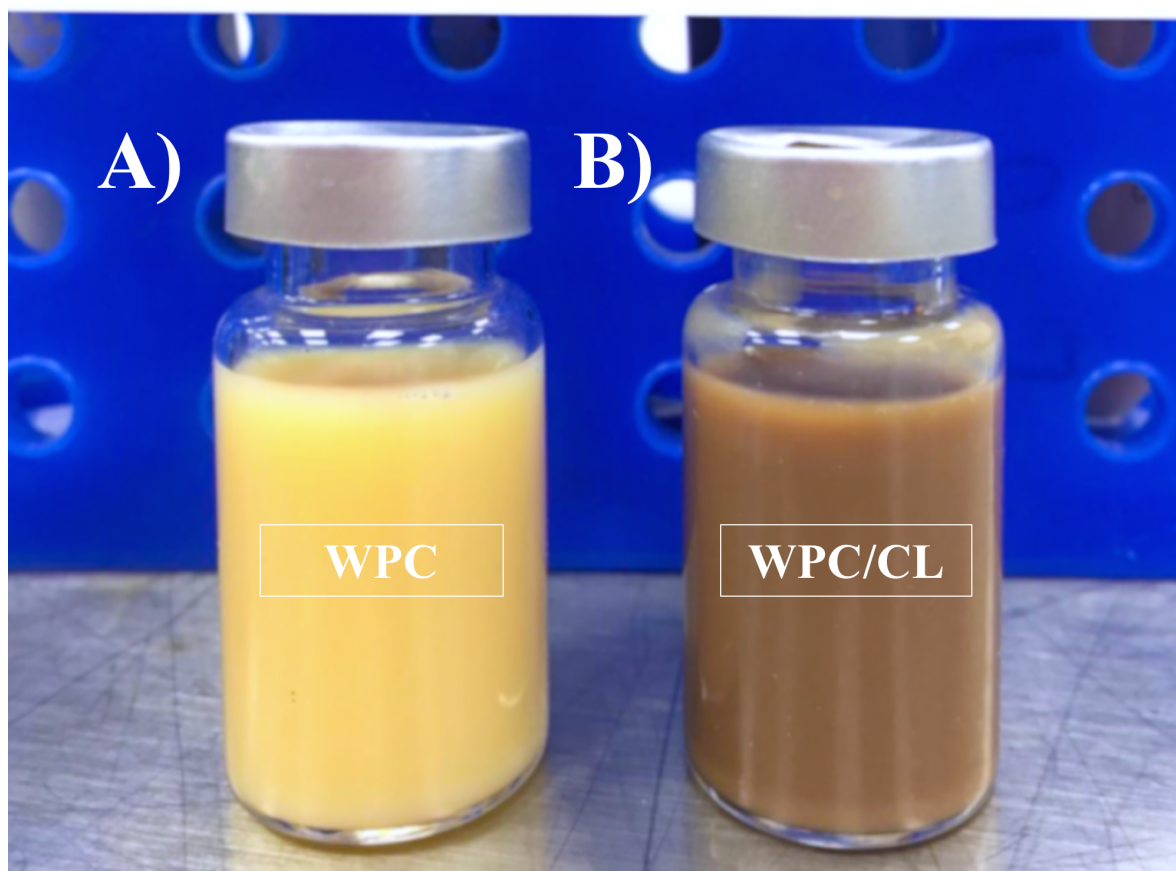

**Figure. S2.** Appearance of the film obtained from (A) protein solution with 8% WPC and 6% glycerol (G); and (B) nanoemulsion with 8% WPC, 6% G and 2% CL.

**A)**

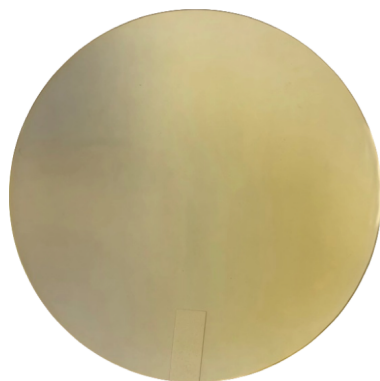

WPC film

**B)**

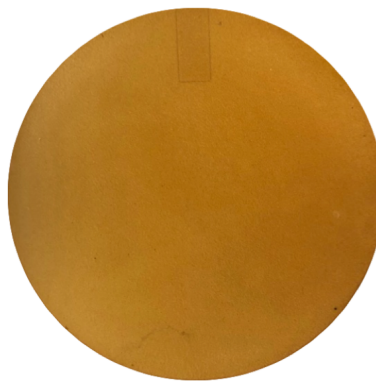

WPC/CL film

**Figure. S3.** Appearance of the muffins (A) uncoated (Control); (B) Coating WPC (with coating 8% WPC and 6% glycerol; and (C) Coating WPC/CL (with coating 8% WPC, 6% glycerol, and 2% cocoa liquor).

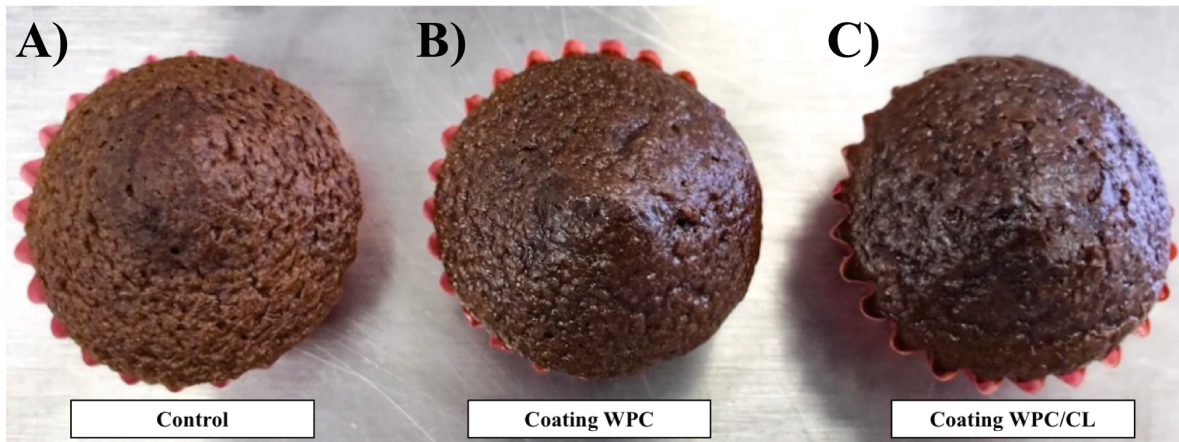

Supplement: s1 [file s1]
